# Supplementary material
Source: PubMed Central journal article supplement (PMC7384726)
Supplement: 12630_2020_1770_MOESM1_ESM.pdf [file 12630_2020_1770_MOESM1_ESM.pdf]

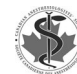

## eAPPENDIX: MedlineALL

Ovid MEDLINE(R) ALL 1946 to May 12, 2020

| #  | Searches                                      | Results |
|----|-----------------------------------------------|---------|
| 1  | exp "Infection Control"/ and exp Respiration/ | 47      |
| 2  | "Respiratory Protective Devices"/             | 2004    |
| 3  | "Masks"/                                      | 4238    |
| 4  | (airborne adj2 precaution*).mp,kw,kf,ot.      | 81      |
| 5  | (air-borne adj2 precaution*).mp,kw,kf,ot.     | 2       |
| 6  | "air-purifying respirator*".mp,kw,kf,ot.      | 177     |
| 7  | (air-purif* adj2 respirator?).mp,kw,kf,ot.    | 187     |
| 8  | (disposable adj4 respirator?).mp,kw,kf,ot.    | 63      |
| 9  | "face shield*".mp,kw,kf,ot.                   | 174     |
| 10 | "facial protection*".mp,kw,kf,ot.             | 90      |
| 11 | "filtering face piece?".mp,kw,kf,ot.          | 22      |
| 12 | "filtering facepiece?".mp,kw,kf,ot.           | 254     |
| 13 | (filtering adj4 respirator?).mp,kw,kf,ot.     | 306     |
| 14 | FFP2.mp,kw,kf,ot.                             | 32      |
| 15 | FFP3.mp,kw,kf,ot.                             | 28      |
| 16 | "mask".mp,kw,kf,ot.                           | 29284   |
| 17 | "masks".mp,kw,kf,ot.                          | 16167   |
| 18 | "medical mask?".mp,kw,kf,ot.                  | 49      |
| 19 | "N95".mp,kw,kf,ot.                            | 1597    |
| 20 | N99.mp,kw,kf,ot.                              | 893     |
| 21 | N100.mp,kw,kf,ot.                             | 3179    |
| 22 | (nanofilter* adj4 respirator?).mp,kw,kf,ot.   | 0       |
| 23 | (nano-filter* adj4 respirator?).mp,kw,kf,ot.  | 0       |
| 24 | "PAPR".mp,kw,kf,ot.                           | 171     |
| 25 | R95.mp,kw,kf,ot.                              | 93      |
| 26 | R99.mp,kw,kf,ot.                              | 80      |
| 27 | R100.mp,kw,kf,ot.                             | 460     |
| 28 | (respiratory adj4 precaution*).mp,kw,kf,ot.   | 90      |
| 29 | (respirat* adj2 protect*).mp,kw,kf,ot.        | 3352    |
| 30 | "respiratory protect*".mp,kw,kf,ot.           | 2628    |
| 31 | (reusable adj4 respirator?).mp,kw,kf,ot.      | 19      |

|    |                                                                                                                                                                                                  |       |
|----|--------------------------------------------------------------------------------------------------------------------------------------------------------------------------------------------------|-------|
| 32 | (re-usable adj4 respirator?).mp,kw,kf,ot.                                                                                                                                                        | 1     |
| 33 | "surgery mask?".mp,kw,kf,ot.                                                                                                                                                                     | 7     |
| 34 | "surgical mask?".mp,kw,kf,ot.                                                                                                                                                                    | 418   |
| 35 | "surgical masks".mp,kw,kf,ot.                                                                                                                                                                    | 273   |
| 36 | or/1-35 [ Masks for respiratory protection ]                                                                                                                                                     | 46714 |
| 37 | 2019 ncov.mp,kw,kf.                                                                                                                                                                              | 768   |
| 38 | 2019ncov.mp,kw,kf.                                                                                                                                                                               | 4     |
| 39 | China.mp,kw. and (exp coronavirus/ or (coronavirus or coronaviruses or coronavirus?? or corona virus or corona viruses or corono virus or corono viruses or pneumonia? or influenza?).mp,kw,kf.) | 8569  |
| 40 | (China and pneumonia? and virus?).mp,kw,kf.                                                                                                                                                      | 864   |
| 41 | (coronavirus?? or corona virus?? or coronavirus??).ti.                                                                                                                                           | 9324  |
| 42 | coronavirus 19.mp,kw,kf.                                                                                                                                                                         | 24    |
| 43 | corona virus 19.mp,kw,kf.                                                                                                                                                                        | 1     |
| 44 | coronavirus 19.mp,kw,kf.                                                                                                                                                                         | 0     |
| 45 | corono virus 19.mp,kw,kf.                                                                                                                                                                        | 0     |
| 46 | corona virus disease 2019.mp,kw,kf.                                                                                                                                                              | 122   |
| 47 | coronavirus disease 2019.mp,kw,kf.                                                                                                                                                               | 1917  |
| 48 | coronavirus disease 2019.mp,kw,kf.                                                                                                                                                               | 2     |
| 49 | corono virus disease 2019.mp,kw,kf.                                                                                                                                                              | 0     |
| 50 | ((coronavirus?? or corona virus?? or coronavirus??) and epidemic*).mp,kw,kf.                                                                                                                     | 2296  |
| 51 | ((coronavirus?? or corona virus?? or coronavirus??) adj2 outbreak?).mp,kw,kf.                                                                                                                    | 467   |
| 52 | ((coronavirus?? or corona virus?? or coronavirus??) and pandem*).mp,kw,kf.                                                                                                                       | 4240  |
| 53 | covid.mp,kw,kf.                                                                                                                                                                                  | 11417 |
| 54 | covid-19.mp,kw,kf.                                                                                                                                                                               | 11328 |
| 55 | covid19.mp,kw,kf.                                                                                                                                                                                | 131   |
| 56 | Hubei.mp,kw. and (exp coronavirus/ or (coronavirus or coronaviruses or coronavirus?? or corona virus or corona viruses or corono virus or corono viruses or pneumonia? or influenza?).mp,kw,kf.) | 428   |
| 57 | (Hubei and pneumonia? and virus?).mp,kw,kf.                                                                                                                                                      | 95    |
| 58 | Hunan.mp,kw. and (exp coronavirus/ or (coronavirus or coronaviruses or coronavirus?? or corona virus or corona viruses or corono virus or corono viruses or pneumonia? or influenza?).mp,kw,kf.) | 109   |
| 59 | (Hunan and pneumonia? and virus?).mp,kw,kf.                                                                                                                                                      | 13    |
| 60 | ncov 2019.mp,kw,kf.                                                                                                                                                                              | 34    |
| 61 | ncov2019.mp,kw,kf.                                                                                                                                                                               | 1     |
| 62 | (ncov and coronavirus??).mp,kw,kf.                                                                                                                                                               | 735   |
| 63 | (ncov and coronavirus??).mp,kw,kf.                                                                                                                                                               | 2     |
| 64 | "new coronavirus?".af.                                                                                                                                                                           | 302   |
| 65 | (new adj6 coronavirus??).mp.                                                                                                                                                                     | 628   |

|     |                                                                                                                                                                                                   |       |
|-----|---------------------------------------------------------------------------------------------------------------------------------------------------------------------------------------------------|-------|
| 66  | (new adj6 coronavirus??).mp.                                                                                                                                                                      | 0     |
| 67  | (novel adj6 corona virus??).mp.                                                                                                                                                                   | 57    |
| 68  | (novel adj6 corono virus??).mp.                                                                                                                                                                   | 0     |
| 69  | (novel adj6 coronavirus??).mp.                                                                                                                                                                    | 2623  |
| 70  | (novel adj6 coronavirus??).mp.                                                                                                                                                                    | 0     |
| 71  | "novel Coronavirus Disease 2019".mp,kw,kf.                                                                                                                                                        | 103   |
| 72  | ("novel coronavirus??" and "2019").mp,kw,kf.                                                                                                                                                      | 1298  |
| 73  | ("novel coronavirus??" and "2019").mp,kw,kf.                                                                                                                                                      | 0     |
| 74  | pandemic?.ti. and coron*.mp.                                                                                                                                                                      | 1017  |
| 75  | sars cov 2.mp,kw,kf.                                                                                                                                                                              | 3428  |
| 76  | sars cov2.mp,kw,kf.                                                                                                                                                                               | 149   |
| 77  | sarscov2.mp,kw,kf.                                                                                                                                                                                | 2     |
| 78  | sarsr-cov2.mp,kw,kf.                                                                                                                                                                              | 0     |
| 79  | sarsrcov2.mp,kw,kf.                                                                                                                                                                               | 0     |
| 80  | sarsr-covs.mp,kw,kf.                                                                                                                                                                              | 9     |
| 81  | sarsrcovs.mp,kw,kf.                                                                                                                                                                               | 0     |
| 82  | "SARS Coronavirus 2".af.                                                                                                                                                                          | 27    |
| 83  | "Severe Acute Respiratory Syndrome Coronavirus 2".nm.                                                                                                                                             | 0     |
| 84  | severe acute respiratory syndrome coronavirus 2.mp,kw,kf.                                                                                                                                         | 3092  |
| 85  | severe acute respiratory syndrome coronavirus 2.mp,kw,kf.                                                                                                                                         | 1     |
| 86  | Wuhan.mp,kw. and (exp coronavirus/ or (coronavirus or coronaviruses or coronavirus?? or corona virus or corona viruses or corono virus or corono viruses or pneumonia? or influenza?).mp,kw,kf.)  | 1206  |
| 87  | (Wuhan and pneumonia? and virus??).mp,kw,kf.                                                                                                                                                      | 294   |
| 88  | wn-cov.mp,kw,kf.                                                                                                                                                                                  | 0     |
| 89  | wncov.mp,kw,kf.                                                                                                                                                                                   | 0     |
| 90  | Yunnan.mp,kw. and (exp coronavirus/ or (coronavirus or coronaviruses or coronavirus?? or corona virus or corona viruses or corono virus or corono viruses or pneumonia? or influenza?).mp,kw,kf.) | 77    |
| 91  | (Yunnan and pneumonia? and virus??).mp,kw,kf.                                                                                                                                                     | 7     |
| 92  | txid2697049.rn,rw.                                                                                                                                                                                | 0     |
| 93  | or/37-92 [ Coronavirus Covid-19 ]                                                                                                                                                                 | 26957 |
| 94  | Humans/ and exp Animals/ and Communicable Diseases, Emerging/ and Zoonoses/                                                                                                                       | 734   |
| 95  | Humans/ and exp Animals/ and Coronavirus/                                                                                                                                                         | 1466  |
| 96  | Humans/ and exp Animals/ and Coronavirus Infections/                                                                                                                                              | 4509  |
| 97  | Humans/ and exp Animals/ and Disease Outbreaks/ and Zoonoses/                                                                                                                                     | 1673  |
| 98  | Humans/ and exp Animals/ and Epidemics/ and Zoonoses/                                                                                                                                             | 77    |
| 99  | Humans/ and exp Animals/ and Global Health/ and Zoonoses/                                                                                                                                         | 484   |
| 100 | Humans/ and exp Animals/ and Pandemics/ and Zoonoses/                                                                                                                                             | 162   |

|     |                                                                                                                                                                                                                                                                                                                                                                                                                                                                                                                                                                                                                                                                                                                                                                                                                                                                                                                                                                                          |         |
|-----|------------------------------------------------------------------------------------------------------------------------------------------------------------------------------------------------------------------------------------------------------------------------------------------------------------------------------------------------------------------------------------------------------------------------------------------------------------------------------------------------------------------------------------------------------------------------------------------------------------------------------------------------------------------------------------------------------------------------------------------------------------------------------------------------------------------------------------------------------------------------------------------------------------------------------------------------------------------------------------------|---------|
| 101 | Humans/ and exp Animals/ and Pneumonia, Viral/ and Zoonoses/                                                                                                                                                                                                                                                                                                                                                                                                                                                                                                                                                                                                                                                                                                                                                                                                                                                                                                                             | 68      |
| 102 | Humans/ and exp Animals/ and Public Health/ and Zoonoses/                                                                                                                                                                                                                                                                                                                                                                                                                                                                                                                                                                                                                                                                                                                                                                                                                                                                                                                                | 1079    |
| 103 | (animal* adj1 human* adj2 interfac*).mp.                                                                                                                                                                                                                                                                                                                                                                                                                                                                                                                                                                                                                                                                                                                                                                                                                                                                                                                                                 | 276     |
| 104 | (animal* adj1 human* adj2 vector*).mp.                                                                                                                                                                                                                                                                                                                                                                                                                                                                                                                                                                                                                                                                                                                                                                                                                                                                                                                                                   | 18      |
| 105 | or/94-104 [ Cross-Species Disease Transmission generally ]                                                                                                                                                                                                                                                                                                                                                                                                                                                                                                                                                                                                                                                                                                                                                                                                                                                                                                                               | 8645    |
| 106 | 93 or 105 [ Covid or Disease Transmission ]                                                                                                                                                                                                                                                                                                                                                                                                                                                                                                                                                                                                                                                                                                                                                                                                                                                                                                                                              | 31207   |
| 107 | 36 and 106 [ Masks + Covid-19 ]                                                                                                                                                                                                                                                                                                                                                                                                                                                                                                                                                                                                                                                                                                                                                                                                                                                                                                                                                          | 360     |
| 108 | 20200409:20201231.(dt). [ Update: April 9 2020 to present ]                                                                                                                                                                                                                                                                                                                                                                                                                                                                                                                                                                                                                                                                                                                                                                                                                                                                                                                              | 136498  |
| 109 | 107 and 108 [ Masks + Covid or Disease Transmission + Date=April 09 2020 - Present ]                                                                                                                                                                                                                                                                                                                                                                                                                                                                                                                                                                                                                                                                                                                                                                                                                                                                                                     | 221     |
| 110 | exp animals/ not (exp animals/ and exp humans/)                                                                                                                                                                                                                                                                                                                                                                                                                                                                                                                                                                                                                                                                                                                                                                                                                                                                                                                                          | 4698080 |
| 111 | 109 not 110                                                                                                                                                                                                                                                                                                                                                                                                                                                                                                                                                                                                                                                                                                                                                                                                                                                                                                                                                                              | 221     |
| 112 | (animal or animals or ape or apes or baboon or baboons or bat or bats or bird or birds or boar or boars or bonobo or bonobos or bovine or camel or camels or canine or canines or cat or cats or cattle or chicken or chickens or chimpanzee or chimpanzees or dog or dogs or dromedary or dromedaries or duck or ducks or equine or equines or feline or felines or ferret or ferrets or frog or frogs or fowl or fowls or goat or goats or hare or hares or hen or hens or horse or horses or lamb or lambs or livestock or macaque or macaques or mandrill or mandrills or mice or mink or minks or monkey or monkeys or mouse or murine or pig or pigs or poultry or porcine or orangutan or orangutans or rabbit or rabbits rat or rats or rodent or rodents or sheep or swine or tamarin or tamarins or tiger or tigers or veterinary or veterinarian or veterinarians or waterfowl or waterfowls or weasel or weasels or veterinar*).ti. or (veterinar* or fish or shellfish).jw. | 2088290 |
| 113 | 109 not 112                                                                                                                                                                                                                                                                                                                                                                                                                                                                                                                                                                                                                                                                                                                                                                                                                                                                                                                                                                              | 220     |
| 114 | 111 or 113                                                                                                                                                                                                                                                                                                                                                                                                                                                                                                                                                                                                                                                                                                                                                                                                                                                                                                                                                                               | 221     |
| 115 | human*.ti.                                                                                                                                                                                                                                                                                                                                                                                                                                                                                                                                                                                                                                                                                                                                                                                                                                                                                                                                                                               | 1050935 |
| 116 | 113 and 115                                                                                                                                                                                                                                                                                                                                                                                                                                                                                                                                                                                                                                                                                                                                                                                                                                                                                                                                                                              | 1       |
| 117 | 114 or 116                                                                                                                                                                                                                                                                                                                                                                                                                                                                                                                                                                                                                                                                                                                                                                                                                                                                                                                                                                               | 221     |
| 118 | limit 117 to english language                                                                                                                                                                                                                                                                                                                                                                                                                                                                                                                                                                                                                                                                                                                                                                                                                                                                                                                                                            | 203     |

## Embase

Embase Classic+Embase 1947 to May 12, 2020

| # | Searches                                      | Results |
|---|-----------------------------------------------|---------|
| 1 | exp "Infection Control"/ and exp Respiration/ | 260     |
| 2 | "Respiratory Protective Devices"/             | 1465    |
| 3 | "Masks"/                                      | 4144    |
| 4 | face mask/ [ Embase ]                         | 6737    |
| 5 | surgical mask/ [ Embase ]                     | 763     |
| 6 | activated carbon n95 mask/ [ Embase ]         | 1       |

|    |                                              |       |
|----|----------------------------------------------|-------|
| 7  | N95 mask/ [ Embase ]                         | 8     |
| 8  | (activated carbon adj2 mask*).mp,kw.         | 14    |
| 9  | (airborne adj2 precaution*).mp,kw.           | 118   |
| 10 | (air-borne adj2 precaution*).mp,kw.          | 4     |
| 11 | "air-purifying respirator*".mp,kw.           | 219   |
| 12 | (air-purif* adj2 respirator?).mp,kw.         | 230   |
| 13 | (disposable adj4 respirator?).mp,kw.         | 74    |
| 14 | "face shield*".mp,kw.                        | 211   |
| 15 | "facial protection*".mp,kw.                  | 99    |
| 16 | "filtering face piece?".mp,kw.               | 25    |
| 17 | "filtering facepiece?".mp,kw.                | 254   |
| 18 | (filtering adj4 respirator?).mp,kw.          | 319   |
| 19 | FFP2.mp,kw.                                  | 37    |
| 20 | FFP3.mp,kw.                                  | 31    |
| 21 | "mask".mp,kw.                                | 62814 |
| 22 | "masks".mp,kw.                               | 10785 |
| 23 | "medical mask?".mp,kw.                       | 54    |
| 24 | "N95".mp,kw.                                 | 3152  |
| 25 | N99.mp,kw.                                   | 2281  |
| 26 | N100.mp,kw.                                  | 6343  |
| 27 | (nanofilter* adj4 respirator?).mp,kw.        | 0     |
| 28 | (nano-filter* adj4 respirator?).mp,kw.       | 0     |
| 29 | "PAPR".mp,kw.                                | 217   |
| 30 | R95.mp,kw.                                   | 165   |
| 31 | R99.mp,kw.                                   | 120   |
| 32 | R100.mp,kw.                                  | 579   |
| 33 | (respiratory adj4 precaution*).mp,kw.        | 117   |
| 34 | (respirat* adj2 protect*).mp,kw.             | 2397  |
| 35 | "respiratory protect*".mp,kw.                | 1394  |
| 36 | (reusable adj4 respirator?).mp,kw.           | 18    |
| 37 | (re-usable adj4 respirator?).mp,kw.          | 1     |
| 38 | "surgery mask?".mp,kw.                       | 9     |
| 39 | "surgical mask?".mp,kw.                      | 984   |
| 40 | "surgical masks".mp,kw.                      | 332   |
| 41 | or/1-40 [ Masks for respiratory protection ] | 83008 |
| 42 | 2019 ncov.mp,kw.                             | 571   |

|    |                                                                                                                                                                                               |       |
|----|-----------------------------------------------------------------------------------------------------------------------------------------------------------------------------------------------|-------|
| 43 | 2019ncov.mp,kw.                                                                                                                                                                               | 3     |
| 44 | China.mp,kw. and (exp coronavirus/ or (coronavirus or coronaviruses or coronavirus?? or corona virus or corona viruses or corono virus or corono viruses or pneumonia? or influenza?).mp,kw.) | 11097 |
| 45 | (China and pneumonia? and virus??).mp,kw.                                                                                                                                                     | 1439  |
| 46 | (coronavirus?? or corona virus?? or coronavirus??).ti.                                                                                                                                        | 8894  |
| 47 | coronavirus 19.mp,kw.                                                                                                                                                                         | 18    |
| 48 | corona virus 19.mp,kw.                                                                                                                                                                        | 1     |
| 49 | coronavirus 19.mp,kw.                                                                                                                                                                         | 0     |
| 50 | corono virus 19.mp,kw.                                                                                                                                                                        | 0     |
| 51 | corona virus disease 2019.mp,kw.                                                                                                                                                              | 102   |
| 52 | coronavirus disease 2019.mp,kw.                                                                                                                                                               | 4169  |
| 53 | coronavirus disease 2019.mp,kw.                                                                                                                                                               | 2     |
| 54 | corono virus disease 2019.mp,kw.                                                                                                                                                              | 0     |
| 55 | ((coronavirus?? or corona virus?? or coronavirus??) and epidemic*).mp,kw.                                                                                                                     | 3744  |
| 56 | ((coronavirus?? or corona virus?? or coronavirus??) adj2 outbreak?).mp,kw.                                                                                                                    | 316   |
| 57 | ((coronavirus?? or corona virus?? or coronavirus??) and pandem*).mp,kw.                                                                                                                       | 3037  |
| 58 | covid.mp,kw.                                                                                                                                                                                  | 7105  |
| 59 | covid-19.mp,kw.                                                                                                                                                                               | 7050  |
| 60 | covid19.mp,kw.                                                                                                                                                                                | 99    |
| 61 | Hubei.mp,kw. and (exp coronavirus/ or (coronavirus or coronaviruses or coronavirus?? or corona virus or corona viruses or corono virus or corono viruses or pneumonia? or influenza?).mp,kw.) | 390   |
| 62 | (Hubei and pneumonia? and virus??).mp,kw.                                                                                                                                                     | 108   |
| 63 | Hunan.mp,kw. and (exp coronavirus/ or (coronavirus or coronaviruses or coronavirus?? or corona virus or corona viruses or corono virus or corono viruses or pneumonia? or influenza?).mp,kw.) | 117   |
| 64 | (Hunan and pneumonia? and virus??).mp,kw.                                                                                                                                                     | 19    |
| 65 | ncov 2019.mp,kw.                                                                                                                                                                              | 8     |
| 66 | ncov2019.mp,kw.                                                                                                                                                                               | 0     |
| 67 | (ncov and coronavirus??).mp,kw.                                                                                                                                                               | 560   |
| 68 | (ncov and coronavirus??).mp,kw.                                                                                                                                                               | 2     |
| 69 | "new coronavirus??" .af.                                                                                                                                                                      | 267   |
| 70 | (new adj6 coronavirus??).mp.                                                                                                                                                                  | 589   |
| 71 | (new adj6 coronavirus??).mp.                                                                                                                                                                  | 0     |
| 72 | (novel adj6 corona virus??).mp.                                                                                                                                                               | 54    |
| 73 | (novel adj6 corono virus??).mp.                                                                                                                                                               | 0     |
| 74 | (novel adj6 coronavirus??).mp.                                                                                                                                                                | 2278  |

|     |                                                                                                                                                                                                |       |
|-----|------------------------------------------------------------------------------------------------------------------------------------------------------------------------------------------------|-------|
| 75  | (novel adj6 coronavirus??).mp.                                                                                                                                                                 | 2     |
| 76  | "novel Coronavirus Disease 2019".mp,kw.                                                                                                                                                        | 76    |
| 77  | ("novel coronavirus??" and "2019").mp,kw.                                                                                                                                                      | 1232  |
| 78  | ("novel coronavirus??" and "2019").mp,kw.                                                                                                                                                      | 1     |
| 79  | pandemic?.ti.                                                                                                                                                                                  | 12210 |
| 80  | sars cov 2.mp,kw.                                                                                                                                                                              | 2203  |
| 81  | sars cov2.mp,kw.                                                                                                                                                                               | 99    |
| 82  | sarscov2.mp,kw.                                                                                                                                                                                | 2     |
| 83  | sarsr-cov2.mp,kw.                                                                                                                                                                              | 0     |
| 84  | sarsrcov2.mp,kw.                                                                                                                                                                               | 0     |
| 85  | sarsr-covs.mp,kw.                                                                                                                                                                              | 8     |
| 86  | sarsrcovs.mp,kw.                                                                                                                                                                               | 0     |
| 87  | "SARS Coronavirus 2".af.                                                                                                                                                                       | 44    |
| 88  | "Severe Acute Respiratory Syndrome Coronavirus 2".ox.                                                                                                                                          | 497   |
| 89  | severe acute respiratory syndrome coronavirus 2.mp,kw.                                                                                                                                         | 1794  |
| 90  | severe acute respiratory syndrome coronavirus 2.mp,kw.                                                                                                                                         | 0     |
| 91  | Wuhan.mp,kw. and (exp coronavirus/ or (coronavirus or coronaviruses or coronavirus?? or corona virus or corona viruses or corono virus or corono viruses or pneumonia? or influenza?).mp,kw.)  | 1068  |
| 92  | (Wuhan and pneumonia? and virus??).mp,kw.                                                                                                                                                      | 314   |
| 93  | wn-cov.mp,kw.                                                                                                                                                                                  | 0     |
| 94  | wncov.mp,kw.                                                                                                                                                                                   | 0     |
| 95  | Yunnan.mp,kw. and (exp coronavirus/ or (coronavirus or coronaviruses or coronavirus?? or corona virus or corona viruses or corono virus or corono viruses or pneumonia? or influenza?).mp,kw.) | 94    |
| 96  | (Yunnan and pneumonia? and virus??).mp,kw.                                                                                                                                                     | 6     |
| 97  | txid2697049.mp,kw.                                                                                                                                                                             | 0     |
| 98  | or/42-97 [ Coronavirus Covid-19 ]                                                                                                                                                              | 36972 |
| 99  | Humans/ and exp Animals/ and Communicable Diseases, Emerging/ and Zoonoses/                                                                                                                    | 58    |
| 100 | Humans/ and exp Animals/ and Communicable Disease/ and Zoonosis/                                                                                                                               | 322   |
| 101 | Humans/ and exp Animals/ and Coronavirus/                                                                                                                                                      | 1709  |
| 102 | Humans/ and exp Animals/ and exp coronavirinae/                                                                                                                                                | 5892  |
| 103 | Humans/ and exp Animals/ and Coronavirus Infections/                                                                                                                                           | 1771  |
| 104 | Humans/ and exp Animals/ and Coronavirus Infection/                                                                                                                                            | 1846  |
| 105 | Humans/ and exp Animals/ and Disease Outbreaks/ and Zoonoses/                                                                                                                                  | 195   |
| 106 | Humans/ and exp Animals/ and Epidemics/ and Zoonoses/                                                                                                                                          | 484   |
| 107 | Humans/ and exp Animals/ and Epidemic/ and Zoonosis/                                                                                                                                           | 1000  |

|     |                                                                                                                                                                                                                                                                                                                                                                                                                                                                                                                                                                                                                                                                                                                                                                                                                                                                                                                                                                                          |         |
|-----|------------------------------------------------------------------------------------------------------------------------------------------------------------------------------------------------------------------------------------------------------------------------------------------------------------------------------------------------------------------------------------------------------------------------------------------------------------------------------------------------------------------------------------------------------------------------------------------------------------------------------------------------------------------------------------------------------------------------------------------------------------------------------------------------------------------------------------------------------------------------------------------------------------------------------------------------------------------------------------------|---------|
| 108 | Humans/ and exp Animals/ and Global Health/ and Zoonoses/                                                                                                                                                                                                                                                                                                                                                                                                                                                                                                                                                                                                                                                                                                                                                                                                                                                                                                                                | 9       |
| 109 | Humans/ and exp Animals/ and Global Health/ and Zoonosis/                                                                                                                                                                                                                                                                                                                                                                                                                                                                                                                                                                                                                                                                                                                                                                                                                                                                                                                                | 40      |
| 110 | Humans/ and exp Animals/ and Pandemics/ and Zoonoses/                                                                                                                                                                                                                                                                                                                                                                                                                                                                                                                                                                                                                                                                                                                                                                                                                                                                                                                                    | 28      |
| 111 | Humans/ and exp Animals/ and Pandemic/ and Zoonosis/                                                                                                                                                                                                                                                                                                                                                                                                                                                                                                                                                                                                                                                                                                                                                                                                                                                                                                                                     | 66      |
| 112 | Humans/ and exp Animals/ and Pandemic Influenza/ and Zoonosis/                                                                                                                                                                                                                                                                                                                                                                                                                                                                                                                                                                                                                                                                                                                                                                                                                                                                                                                           | 13      |
| 113 | Humans/ and exp Animals/ and Pneumonia, Viral/ and Zoonoses/                                                                                                                                                                                                                                                                                                                                                                                                                                                                                                                                                                                                                                                                                                                                                                                                                                                                                                                             | 3       |
| 114 | Humans/ and exp Animals/ and exp virus pneumonia/ and Zoonosis/                                                                                                                                                                                                                                                                                                                                                                                                                                                                                                                                                                                                                                                                                                                                                                                                                                                                                                                          | 142     |
| 115 | Humans/ and exp Animals/ and Public Health/ and Zoonoses/                                                                                                                                                                                                                                                                                                                                                                                                                                                                                                                                                                                                                                                                                                                                                                                                                                                                                                                                | 378     |
| 116 | Humans/ and exp Animals/ and Public Health/ and Zoonosis/                                                                                                                                                                                                                                                                                                                                                                                                                                                                                                                                                                                                                                                                                                                                                                                                                                                                                                                                | 700     |
| 117 | (animal* adj1 human* adj2 interfac*).mp.                                                                                                                                                                                                                                                                                                                                                                                                                                                                                                                                                                                                                                                                                                                                                                                                                                                                                                                                                 | 302     |
| 118 | (animal* adj1 human* adj2 vector*).mp.                                                                                                                                                                                                                                                                                                                                                                                                                                                                                                                                                                                                                                                                                                                                                                                                                                                                                                                                                   | 23      |
| 119 | or/99-118 [ Cross-Species Disease Transmission generally ]                                                                                                                                                                                                                                                                                                                                                                                                                                                                                                                                                                                                                                                                                                                                                                                                                                                                                                                               | 9968    |
| 120 | 98 or 119 [ Covid or Disease Transmission ]                                                                                                                                                                                                                                                                                                                                                                                                                                                                                                                                                                                                                                                                                                                                                                                                                                                                                                                                              | 40826   |
| 121 | 41 and 120 [ Masks + Covid ]                                                                                                                                                                                                                                                                                                                                                                                                                                                                                                                                                                                                                                                                                                                                                                                                                                                                                                                                                             | 644     |
| 122 | limit 121 to dc=20200409-20201231                                                                                                                                                                                                                                                                                                                                                                                                                                                                                                                                                                                                                                                                                                                                                                                                                                                                                                                                                        | 222     |
| 123 | limit 121 to dd=20200409-20201231                                                                                                                                                                                                                                                                                                                                                                                                                                                                                                                                                                                                                                                                                                                                                                                                                                                                                                                                                        | 109     |
| 124 | or/122-123 [ Masks + Covid-19 + Date=April 9 2020 - present ]                                                                                                                                                                                                                                                                                                                                                                                                                                                                                                                                                                                                                                                                                                                                                                                                                                                                                                                            | 222     |
| 125 | (exp animals/ or exp animal experimentation/ or nonhuman/) not ((exp animals/ or exp animal experimentation/ or nonhuman/) and exp human/)                                                                                                                                                                                                                                                                                                                                                                                                                                                                                                                                                                                                                                                                                                                                                                                                                                               | 7263630 |
| 126 | 124 not 125                                                                                                                                                                                                                                                                                                                                                                                                                                                                                                                                                                                                                                                                                                                                                                                                                                                                                                                                                                              | 211     |
| 127 | (animal or animals or ape or apes or baboon or baboons or bat or bats or bird or birds or boar or boars or bonobo or bonobos or bovine or camel or camels or canine or canines or cat or cats or cattle or chicken or chickens or chimpanzee or chimpanzees or dog or dogs or dromedary or dromedaries or duck or ducks or equine or equines or feline or felines or ferret or ferrets or frog or frogs or fowl or fowls or goat or goats or hare or hares or hen or hens or horse or horses or lamb or lambs or livestock or macaque or macaques or mandrill or mandrills or mice or mink or minks or monkey or monkeys or mouse or murine or pig or pigs or poultry or porcine or orangutan or orangutans or rabbit or rabbits rat or rats or rodent or rodents or sheep or swine or tamarin or tamarins or tiger or tigers or veterinary or veterinarian or veterinarians or waterfowl or waterfowls or weasel or weasels or veterinar*).ti. or (veterinar* or fish or shellfish).jw. | 2504277 |
| 128 | 124 not 127                                                                                                                                                                                                                                                                                                                                                                                                                                                                                                                                                                                                                                                                                                                                                                                                                                                                                                                                                                              | 219     |
| 129 | 126 or 128                                                                                                                                                                                                                                                                                                                                                                                                                                                                                                                                                                                                                                                                                                                                                                                                                                                                                                                                                                               | 221     |
| 130 | human*.ti.                                                                                                                                                                                                                                                                                                                                                                                                                                                                                                                                                                                                                                                                                                                                                                                                                                                                                                                                                                               | 1259708 |
| 131 | 128 and 130                                                                                                                                                                                                                                                                                                                                                                                                                                                                                                                                                                                                                                                                                                                                                                                                                                                                                                                                                                              | 2       |
| 132 | 129 or 131                                                                                                                                                                                                                                                                                                                                                                                                                                                                                                                                                                                                                                                                                                                                                                                                                                                                                                                                                                               | 221     |
| 133 | remove duplicates from 132                                                                                                                                                                                                                                                                                                                                                                                                                                                                                                                                                                                                                                                                                                                                                                                                                                                                                                                                                               | 219     |
| 134 | 41 and 133 [ Masks + Covid-19 ]                                                                                                                                                                                                                                                                                                                                                                                                                                                                                                                                                                                                                                                                                                                                                                                                                                                                                                                                                          | 219     |



## Cochrane library

Cochrane Central Register of Controlled Trials 2014 to Present

| #  | Searches                                      | Results |
|----|-----------------------------------------------|---------|
| 1  | exp "Infection Control"/ and exp Respiration/ | 1       |
| 2  | "Respiratory Protective Devices"/             | 67      |
| 3  | "Masks"/                                      | 476     |
| 4  | face mask/ [ Embase ]                         | 0       |
| 5  | surgical mask/ [ Embase ]                     | 0       |
| 6  | activated carbon n95 mask/ [ Embase ]         | 0       |
| 7  | N95 mask/ [ Embase ]                          | 0       |
| 8  | (activated carbon adj2 mask*).mp,kw.          | 1       |
| 9  | (airborne adj2 precaution*).mp,kw.            | 3       |
| 10 | (air-borne adj2 precaution*).mp,kw.           | 0       |
| 11 | "air-purifying respirator*".mp,kw.            | 18      |
| 12 | (air-purif* adj2 respirator?).mp,kw.          | 19      |
| 13 | (disposable adj4 respirator?).mp,kw.          | 6       |
| 14 | "face shield*".mp,kw.                         | 11      |
| 15 | "facial protection*".mp,kw.                   | 2       |
| 16 | "filtering face piece?".mp,kw.                | 0       |
| 17 | "filtering facepiece?".mp,kw.                 | 12      |
| 18 | (filtering adj4 respirator?).mp,kw.           | 16      |
| 19 | FFP2.mp,kw.                                   | 3       |
| 20 | FFP3.mp,kw.                                   | 0       |
| 21 | "mask".mp,kw.                                 | 7501    |
| 22 | "masks".mp,kw.                                | 2069    |
| 23 | "medical mask?".mp,kw.                        | 20      |
| 24 | "N95".mp,kw.                                  | 408     |
| 25 | N99.mp,kw.                                    | 507     |
| 26 | N100.mp,kw.                                   | 1100    |
| 27 | (nanofilter* adj4 respirator?).mp,kw.         | 0       |
| 28 | (nano-filter* adj4 respirator?).mp,kw.        | 0       |
| 29 | "PAPR".mp,kw.                                 | 14      |
| 30 | R95.mp,kw.                                    | 2       |
| 31 | R99.mp,kw.                                    | 32      |
| 32 | R100.mp,kw.                                   | 25      |

|    |                                                                                                                                                                                               |      |
|----|-----------------------------------------------------------------------------------------------------------------------------------------------------------------------------------------------|------|
| 33 | (respiratory adj4 precaution*).mp,kw.                                                                                                                                                         | 11   |
| 34 | (respirat* adj2 protect*).mp,kw.                                                                                                                                                              | 198  |
| 35 | "respiratory protect*".mp,kw.                                                                                                                                                                 | 99   |
| 36 | (reusable adj4 respirator?).mp,kw.                                                                                                                                                            | 1    |
| 37 | (re-usable adj4 respirator?).mp,kw.                                                                                                                                                           | 0    |
| 38 | "surgery mask?".mp,kw.                                                                                                                                                                        | 3    |
| 39 | "surgical mask?".mp,kw.                                                                                                                                                                       | 46   |
| 40 | "surgical masks".mp,kw.                                                                                                                                                                       | 32   |
| 41 | or/1-40 [ Masks for respiratory protection ]                                                                                                                                                  | 9977 |
| 42 | 2019 ncov.mp,kw.                                                                                                                                                                              | 33   |
| 43 | 2019ncov.mp,kw.                                                                                                                                                                               | 0    |
| 44 | China.mp,kw. and (exp coronavirus/ or (coronavirus or coronaviruses or coronavirus?? or corona virus or corona viruses or corono virus or corono viruses or pneumonia? or influenza?).mp,kw.) | 371  |
| 45 | (China and pneumonia? and virus??).mp,kw.                                                                                                                                                     | 35   |
| 46 | (coronavirus?? or corona virus?? or coronavirus??).ti.                                                                                                                                        | 72   |
| 47 | coronavirus 19.mp,kw.                                                                                                                                                                         | 0    |
| 48 | corona virus 19.mp,kw.                                                                                                                                                                        | 0    |
| 49 | coronavirus 19.mp,kw.                                                                                                                                                                         | 0    |
| 50 | corono virus 19.mp,kw.                                                                                                                                                                        | 0    |
| 51 | corona virus disease 2019.mp,kw.                                                                                                                                                              | 6    |
| 52 | coronavirus disease 2019.mp,kw.                                                                                                                                                               | 25   |
| 53 | coronavirus disease 2019.mp,kw.                                                                                                                                                               | 0    |
| 54 | corono virus disease 2019.mp,kw.                                                                                                                                                              | 0    |
| 55 | ((coronavirus?? or corona virus?? or coronavirus??) and epidemic*).mp,kw.                                                                                                                     | 37   |
| 56 | ((coronavirus?? or corona virus?? or coronavirus??) adj2 outbreak?).mp,kw.                                                                                                                    | 4    |
| 57 | ((coronavirus?? or corona virus?? or coronavirus??) and pandem*).mp,kw.                                                                                                                       | 39   |
| 58 | covid.mp,kw.                                                                                                                                                                                  | 276  |
| 59 | covid-19.mp,kw.                                                                                                                                                                               | 273  |
| 60 | covid19.mp,kw.                                                                                                                                                                                | 21   |
| 61 | Hubei.mp,kw. and (exp coronavirus/ or (coronavirus or coronaviruses or coronavirus?? or corona virus or corona viruses or corono virus or corono viruses or pneumonia? or influenza?).mp,kw.) | 17   |
| 62 | (Hubei and pneumonia? and virus??).mp,kw.                                                                                                                                                     | 8    |
| 63 | Hunan.mp,kw. and (exp coronavirus/ or (coronavirus or coronaviruses or coronavirus?? or corona virus or corona viruses or corono virus or corono viruses or pneumonia? or influenza?).mp,kw.) | 1    |
| 64 | (Hunan and pneumonia? and virus??).mp,kw.                                                                                                                                                     | 0    |
| 65 | ncov 2019.mp,kw.                                                                                                                                                                              | 0    |

|    |                                                                                                                                                                                                |     |
|----|------------------------------------------------------------------------------------------------------------------------------------------------------------------------------------------------|-----|
| 66 | ncov2019.mp,kw.                                                                                                                                                                                | 0   |
| 67 | (ncov and coronavirus?).mp,kw.                                                                                                                                                                 | 32  |
| 68 | (ncov and coronavirus?).mp,kw.                                                                                                                                                                 | 1   |
| 69 | "new coronavirus?".af.                                                                                                                                                                         | 26  |
| 70 | (new adj6 coronavirus?).mp.                                                                                                                                                                    | 35  |
| 71 | (new adj6 coronavirus?).mp.                                                                                                                                                                    | 0   |
| 72 | (novel adj6 corona virus?).mp.                                                                                                                                                                 | 1   |
| 73 | (novel adj6 corono virus?).mp.                                                                                                                                                                 | 0   |
| 74 | (novel adj6 coronavirus?).mp.                                                                                                                                                                  | 49  |
| 75 | (novel adj6 coronavirus?).mp.                                                                                                                                                                  | 0   |
| 76 | "novel Coronavirus Disease 2019".mp,kw.                                                                                                                                                        | 1   |
| 77 | ("novel coronavirus?" and "2019").mp,kw.                                                                                                                                                       | 31  |
| 78 | ("novel coronavirus?" and "2019").mp,kw.                                                                                                                                                       | 0   |
| 79 | pandemic?.ti.                                                                                                                                                                                  | 304 |
| 80 | sars cov 2.mp,kw.                                                                                                                                                                              | 108 |
| 81 | sars cov2.mp,kw.                                                                                                                                                                               | 24  |
| 82 | sarscov2.mp,kw.                                                                                                                                                                                | 1   |
| 83 | sarsr-cov2.mp,kw.                                                                                                                                                                              | 0   |
| 84 | sarsrcov2.mp,kw.                                                                                                                                                                               | 0   |
| 85 | sarsr-covs.mp,kw.                                                                                                                                                                              | 0   |
| 86 | sarsrcovs.mp,kw.                                                                                                                                                                               | 0   |
| 87 | "SARS Coronavirus 2".af.                                                                                                                                                                       | 2   |
| 88 | ["Severe Acute Respiratory Syndrome Coronavirus 2".ox.]                                                                                                                                        | 0   |
| 89 | severe acute respiratory syndrome coronavirus 2.mp,kw.                                                                                                                                         | 19  |
| 90 | severe acute respiratory syndrome coronavirus 2.mp,kw.                                                                                                                                         | 0   |
| 91 | Wuhan.mp,kw. and (exp coronavirus/ or (coronavirus or coronaviruses or coronavirus?? or corona virus or corona viruses or corono virus or corono viruses or pneumonia? or influenza?).mp,kw.)  | 55  |
| 92 | (Wuhan and pneumonia? and virus?).mp,kw.                                                                                                                                                       | 18  |
| 93 | wn-cov.mp,kw.                                                                                                                                                                                  | 0   |
| 94 | wncov.mp,kw.                                                                                                                                                                                   | 0   |
| 95 | Yunnan.mp,kw. and (exp coronavirus/ or (coronavirus or coronaviruses or coronavirus?? or corona virus or corona viruses or corono virus or corono viruses or pneumonia? or influenza?).mp,kw.) | 2   |
| 96 | (Yunnan and pneumonia? and virus?).mp,kw.                                                                                                                                                      | 0   |
| 97 | txid2697049.mp,kw.                                                                                                                                                                             | 0   |
| 98 | or/42-97 [ Coronavirus Covid-19 ]                                                                                                                                                              | 972 |
| 99 | Humans/ and exp Animals/ and Communicable Diseases, Emerging/ and Zoonoses/                                                                                                                    | 0   |

|     |                                                                  |     |
|-----|------------------------------------------------------------------|-----|
| 100 | Humans/ and exp Animals/ and Communicable Disease/ and Zoonosis/ | 0   |
| 101 | Humans/ and exp Animals/ and Coronavirus/                        | 2   |
| 102 | Humans/ and exp Animals/ and exp coronavirinae/                  | 0   |
| 103 | Humans/ and exp Animals/ and Coronavirus Infections/             | 2   |
| 104 | Humans/ and exp Animals/ and Coronavirus Infection/              | 2   |
| 105 | Humans/ and exp Animals/ and Disease Outbreaks/ and Zoonoses/    | 0   |
| 106 | Humans/ and exp Animals/ and Epidemics/ and Zoonoses/            | 0   |
| 107 | Humans/ and exp Animals/ and Epidemic/ and Zoonosis/             | 0   |
| 108 | Humans/ and exp Animals/ and Global Health/ and Zoonoses/        | 0   |
| 109 | Humans/ and exp Animals/ and Global Health/ and Zoonosis/        | 0   |
| 110 | Humans/ and exp Animals/ and Pandemics/ and Zoonoses/            | 0   |
| 111 | Humans/ and exp Animals/ and Pandemic/ and Zoonosis/             | 0   |
| 112 | Humans/ and exp Animals/ and Pandemic Influenza/ and Zoonosis/   | 0   |
| 113 | Humans/ and exp Animals/ and Pneumonia, Viral/ and Zoonoses/     | 0   |
| 114 | Humans/ and exp Animals/ and exp virus pneumonia/ and Zoonosis/  | 0   |
| 115 | Humans/ and exp Animals/ and Public Health/ and Zoonoses/        | 0   |
| 116 | Humans/ and exp Animals/ and Public Health/ and Zoonosis/        | 0   |
| 117 | (animal* adj1 human* adj2 interfac*).mp.                         | 0   |
| 118 | (animal* adj1 human* adj2 vector*).mp.                           | 1   |
| 119 | or/99-118 [ Cross-Species Disease Transmission generally ]       | 4   |
| 120 | 98 or 119 [ Covid or Disease Transmission ]                      | 974 |
| 121 | 41 and 120 [ Masks + Covid ]                                     | 22  |
| 122 | remove duplicates from 121                                       | 20  |

### Cochrane Database of Systematic Reviews 2005 to Present

| # | Searches                             | Results |
|---|--------------------------------------|---------|
| 1 | (activated carbon adj2 mask*).mp,kw. | 0       |
| 2 | (airborne adj2 precaution*).mp,kw.   | 3       |
| 3 | (air-borne adj2 precaution*).mp,kw.  | 0       |
| 4 | "air-purifying respirator*".mp,kw.   | 2       |
| 5 | (air-purif* adj2 respirator?).mp,kw. | 2       |
| 6 | (disposable adj4 respirator?).mp,kw. | 0       |
| 7 | "face shield*".mp,kw.                | 5       |
| 8 | "facial protection*".mp,kw.          | 2       |

|    |                                                       |      |
|----|-------------------------------------------------------|------|
| 9  | "filtering face piece?".mp,kw.                        | 1    |
| 10 | "filtering facepiece?".mp,kw.                         | 1    |
| 11 | (filtering adj4 respirator?).mp,kw.                   | 1    |
| 12 | FFP2.mp,kw.                                           | 0    |
| 13 | FFP3.mp,kw.                                           | 0    |
| 14 | "mask".mp,kw.                                         | 2365 |
| 15 | "masks".mp,kw.                                        | 99   |
| 16 | "medical mask?".mp,kw.                                | 2    |
| 17 | "N95".mp,kw.                                          | 14   |
| 18 | N99.mp,kw.                                            | 9    |
| 19 | N100.mp,kw.                                           | 20   |
| 20 | (nanofilter* adj4 respirator?).mp,kw.                 | 0    |
| 21 | (nano-filter* adj4 respirator?).mp,kw.                | 0    |
| 22 | "PAPR".mp,kw.                                         | 3    |
| 23 | R95.mp,kw.                                            | 0    |
| 24 | R99.mp,kw.                                            | 0    |
| 25 | R100.mp,kw.                                           | 1    |
| 26 | (respiratory adj4 precaution*).mp,kw.                 | 2    |
| 27 | (respirat* adj2 protect*).mp,kw.                      | 12   |
| 28 | "respiratory protect*".mp,kw.                         | 7    |
| 29 | (reusable adj4 respirator?).mp,kw.                    | 0    |
| 30 | (re-usable adj4 respirator?).mp,kw.                   | 0    |
| 31 | "surgery mask?".mp,kw.                                | 0    |
| 32 | "surgical mask?".mp,kw.                               | 7    |
| 33 | "surgical masks".mp,kw.                               | 7    |
| 34 | or/1-33 [ Masks / N95 Respirators & related terms ]   | 2415 |
| 35 | 2019 ncov.mp,kw.                                      | 2    |
| 36 | 2019ncov.mp,kw.                                       | 0    |
| 37 | (China and pneumonia? and virus?).mp,kw.              | 51   |
| 38 | (coronavirus?? or corona virus?? or coronavirus?).ti. | 0    |
| 39 | coronavirus 19.mp,kw.                                 | 0    |
| 40 | corona virus 19.mp,kw.                                | 0    |
| 41 | coronavirus 19.mp,kw.                                 | 0    |
| 42 | corono virus 19.mp,kw.                                | 0    |
| 43 | corona virus disease 2019.mp,kw.                      | 0    |
| 44 | coronavirus disease 2019.mp,kw.                       | 2    |

|    |                                                                            |   |
|----|----------------------------------------------------------------------------|---|
| 45 | coronavirus disease 2019.mp,kw.                                            | 0 |
| 46 | corono virus disease 2019.mp,kw.                                           | 0 |
| 47 | ((coronavirus?? or corona virus?? or coronavirus??) and epidemic*).mp,kw.  | 7 |
| 48 | ((coronavirus?? or corona virus?? or coronavirus??) adj2 outbreak?).mp,kw. | 1 |
| 49 | ((coronavirus?? or corona virus?? or coronavirus??) and pandem*).mp,kw.    | 8 |
| 50 | covid.mp,kw.                                                               | 7 |
| 51 | covid-19.mp,kw.                                                            | 7 |
| 52 | covid19.mp,kw.                                                             | 1 |
| 53 | (Hubei and pneumonia? and virus??).mp,kw.                                  | 1 |
| 54 | (Hunan and pneumonia? and virus??).mp,kw.                                  | 0 |
| 55 | ncov 2019.mp,kw.                                                           | 1 |
| 56 | ncov2019.mp,kw.                                                            | 0 |
| 57 | (ncov and coronavirus??).mp,kw.                                            | 2 |
| 58 | (ncov and coronavirus??).mp,kw.                                            | 0 |
| 59 | "new coronavirus??.af.                                                     | 3 |
| 60 | (new adj6 coronavirus??).mp.                                               | 2 |
| 61 | (new adj6 coronavirus??).mp.                                               | 0 |
| 62 | (novel adj6 corona virus??).mp.                                            | 0 |
| 63 | (novel adj6 corono virus??).mp.                                            | 0 |
| 64 | (novel adj6 coronavirus??).mp.                                             | 6 |
| 65 | (novel adj6 coronavirus??).mp.                                             | 0 |
| 66 | "novel Coronavirus Disease 2019".mp,kw.                                    | 0 |
| 67 | ("novel coronavirus??" and "2019").mp,kw.                                  | 4 |
| 68 | ("novel coronavirus??" and "2019").mp,kw.                                  | 0 |
| 69 | pandemic?.ti.                                                              | 0 |
| 70 | sars cov 2.mp,kw.                                                          | 6 |
| 71 | sars cov2.mp,kw.                                                           | 0 |
| 72 | sarscov2.mp,kw.                                                            | 0 |
| 73 | sarsr-cov2.mp,kw.                                                          | 0 |
| 74 | sarsrcov2.mp,kw.                                                           | 0 |
| 75 | sarsr-covs.mp,kw.                                                          | 0 |
| 76 | sarsrcovs.mp,kw.                                                           | 0 |
| 77 | "SARS Coronavirus 2".af.                                                   | 0 |
| 78 | severe acute respiratory syndrome coronavirus 2.mp,kw.                     | 4 |
| 79 | severe acute respiratory syndrome coronavirus 2.mp,kw.                     | 0 |
| 80 | (Wuhan and pneumonia? and virus??).mp,kw.                                  | 4 |

|    |                                                     |    |
|----|-----------------------------------------------------|----|
| 81 | wn-cov.mp,kw.                                       | 0  |
| 82 | wncov.mp,kw.                                        | 0  |
| 83 | (Yunnan and pneumonia? and virus??).mp,kw.          | 0  |
| 84 | txid2697049.mp,kw.                                  | 0  |
| 85 | (animal* adj1 human* adj2 interfac*).mp.            | 0  |
| 86 | (animal* adj1 human* adj2 vector*).mp.              | 0  |
| 87 | or/35-86 [ Covid-19 OR SARS-CoV-2 & related terms ] | 56 |
| 88 | 34 and 87 [ Masks + Covid-19 ]                      | 23 |
| 89 | limit 88 to full systematic reviews                 | 22 |
| 90 | limit 89 to last year                               | 5  |

## ClinicalTrials.Gov

91 Studies found for: Mask OR masks OR shield OR shields OR FFP2 OR FFP3 OR facepiece OR face piece OR hood OR hoods OR N95 OR N99 OR N100 OR R95 OR R99 OR R100 OR reusable OR reuseable OR ((repirator OR respirators) AND (preventive OR personal OR equipment)) OR PPE | covid-19 OR SARS-CoV-2 OR severe acute respiratory syndrome coronavirus 2 OR 2019- nCoV OR 2019 novel coronavirus OR Wuhan coronavirus OR pandemic OR Corona Virus Disease 2019

<https://clinicaltrials.gov/ct2/results?cond=covid-19+OR+SARS-CoV-2+OR+severe+acute+respiratory+syndrome+coronavirus+2+OR+2019-nCoV+OR+2019+novel+coronavirus+OR+Wuhan+coronavirus+OR+pandemic+OR+Corona+Virus+Disease+2019&term=Mask+OR+masks+OR+shield+OR+shields+OR+FFP2+OR+FFP3+OR+facepiece+OR+face+piece+OR+hood+OR+hoods+OR+N95+OR+N99+OR+N100+OR+R95+OR+R99+OR+R100+OR+reusable+OR+reuseable+OR+%28%28repirator+OR+respirators%29+AND+%28preventive+OR+personal+OR+equipment%29%29+OR+PPE&cntry=&state=&city=&dist=&Search=Search>
